# Supplementary material for: Variation in the Concentration of Tilia spp. Pollen in the Aeroplankton of Lublin and Szczecin, Poland
Source: MDPI journal article supplement (doi:10.3390/plants12061415), 2023-03-22
Supplement: s1 [file s1]

**Table S1.** The list of Spearman's correlations between the daily pollen count and meteorological factors in Lublin and Szczecin (2020-2022).

| Meteorological parameters | Spearman coefficient |           |
|---------------------------|----------------------|-----------|
|                           | Lublin               | Szczecin  |
| Mean temperature          | 0,00778              | -0,04277  |
| Humidity                  | 0,15684*             | 0,16791*  |
| Rainfall                  | 0,13390              | 0,21689** |

Level of significance \* 0.05, \*\* 0.01
